# Supplementary material for: Metabolic Profiles of Brassica juncea Roots in Response to Cadmium Stress
Source: MDPI journal article supplement (doi:10.3390/metabo11060383), 2021-06-13
Supplement: s1 [file s1]

(A)

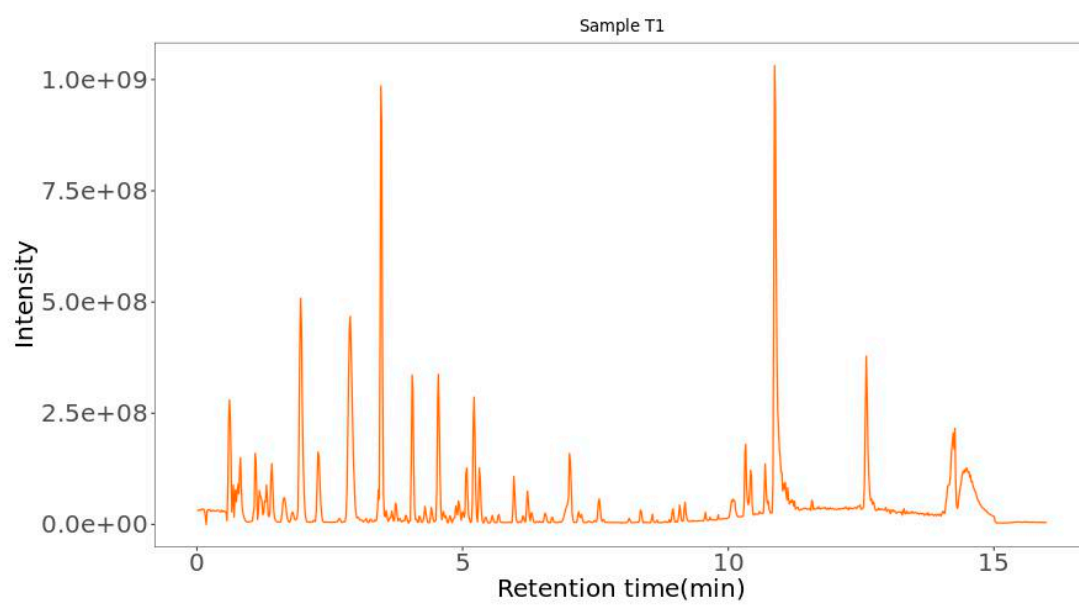

(B)

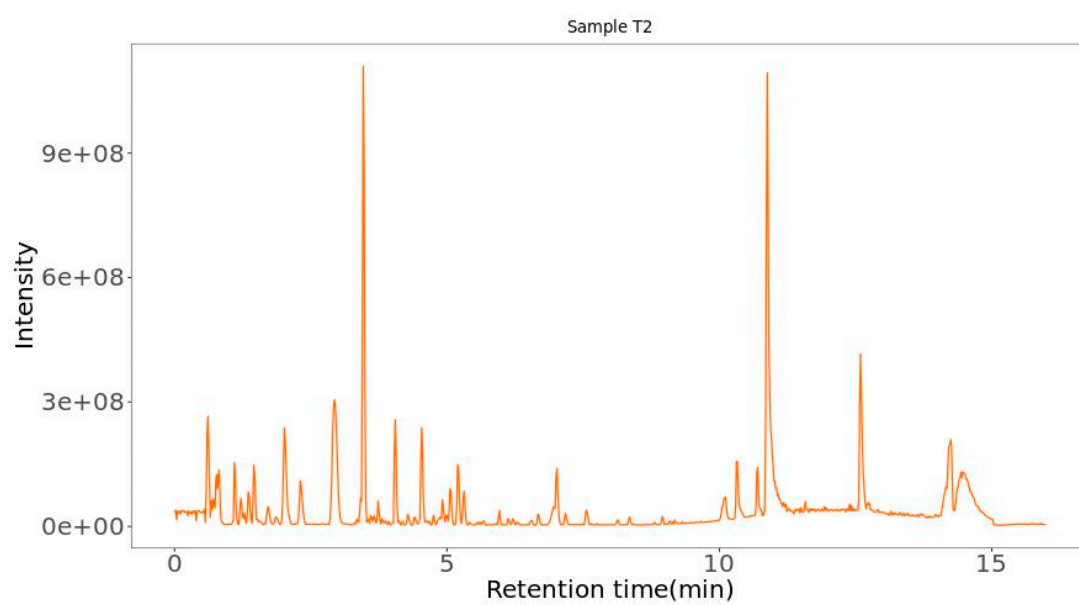

(C)

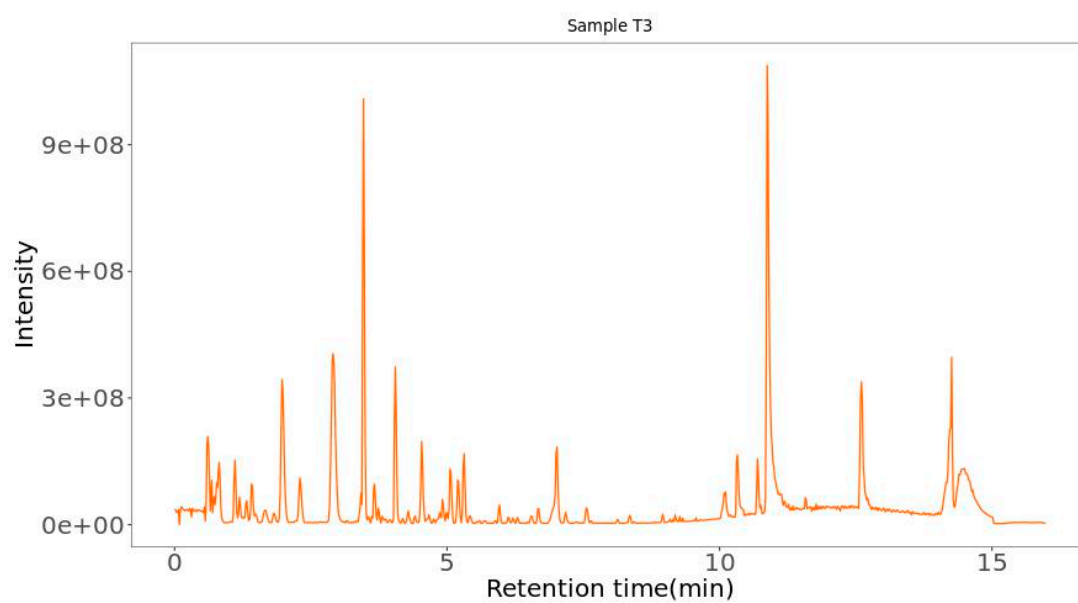

**Fig. S1.** Base peak chromatogram of the T1 (A), T2 (B), and T3 (C) samples in positive ESI mode.

(A)

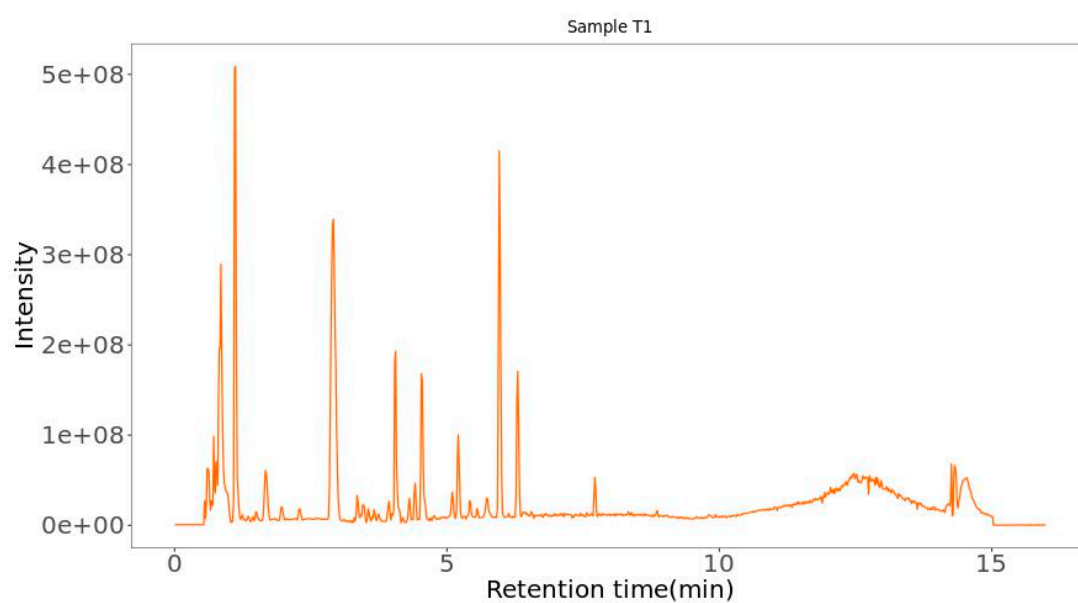

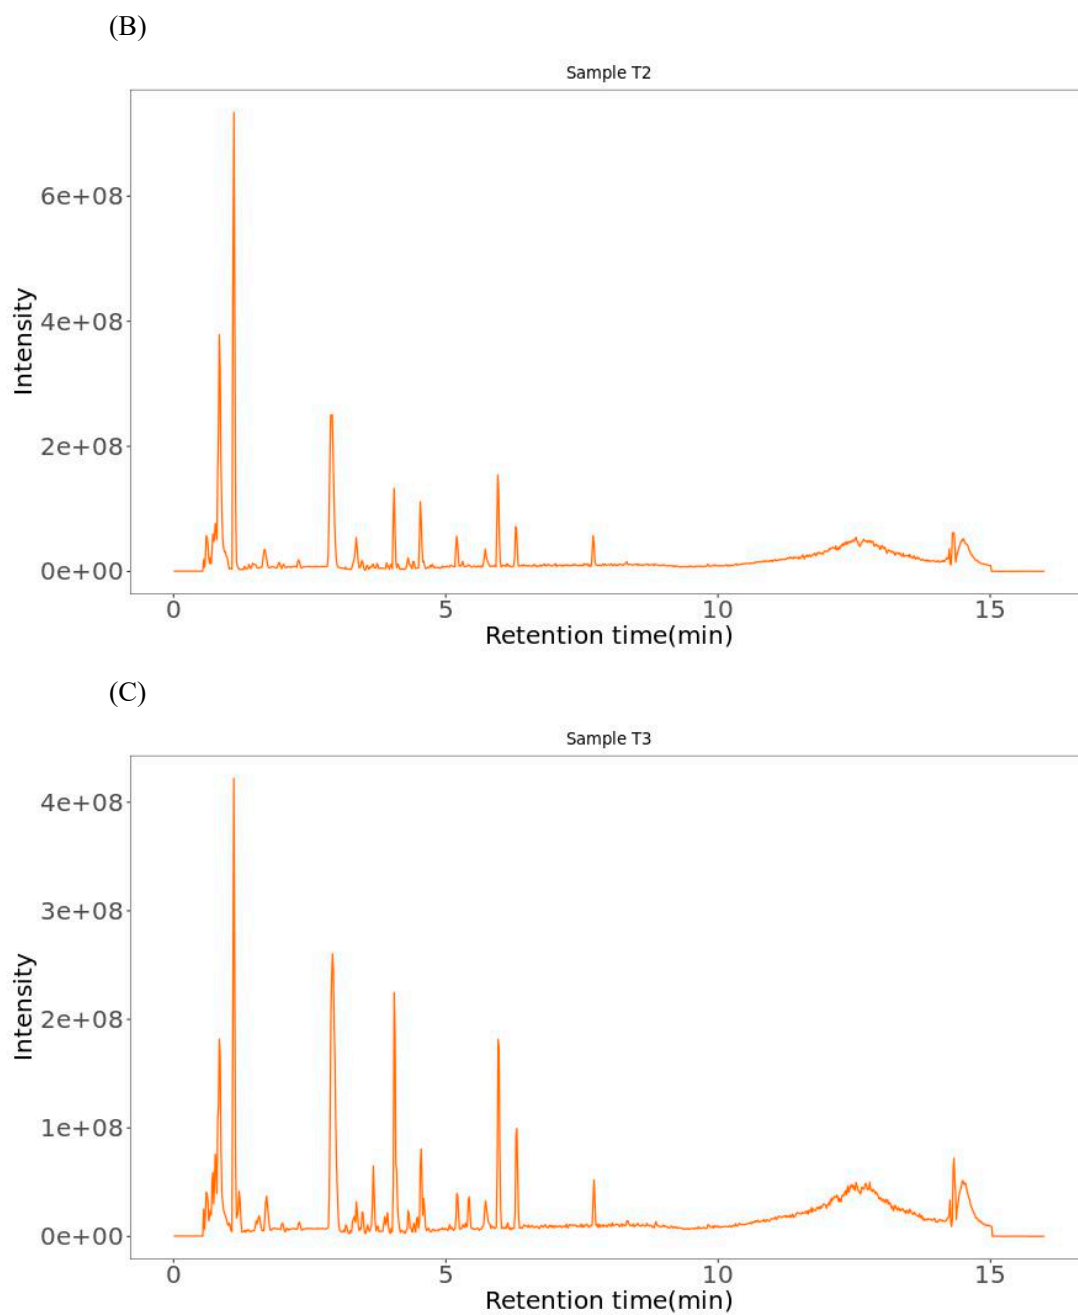

**Fig. S2.** Base peak chromatogram of the T1 (A), T2 (B), and T3 (C) samples in negative ESI mode.

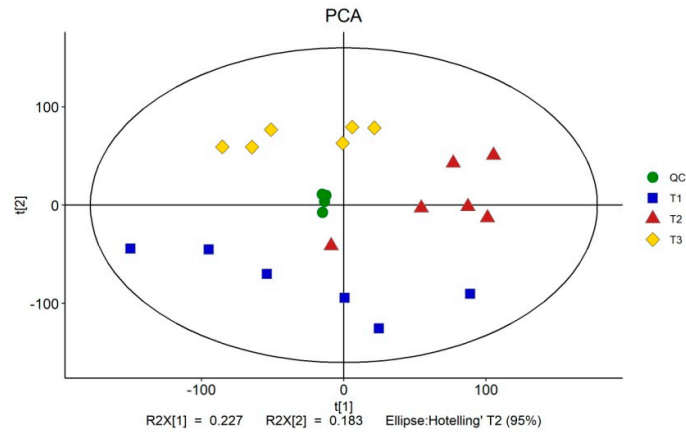

**Fig. S3.** PCA score scatter plots of LC-MS data from six biological replicates of each *Brassica juncea* sample.

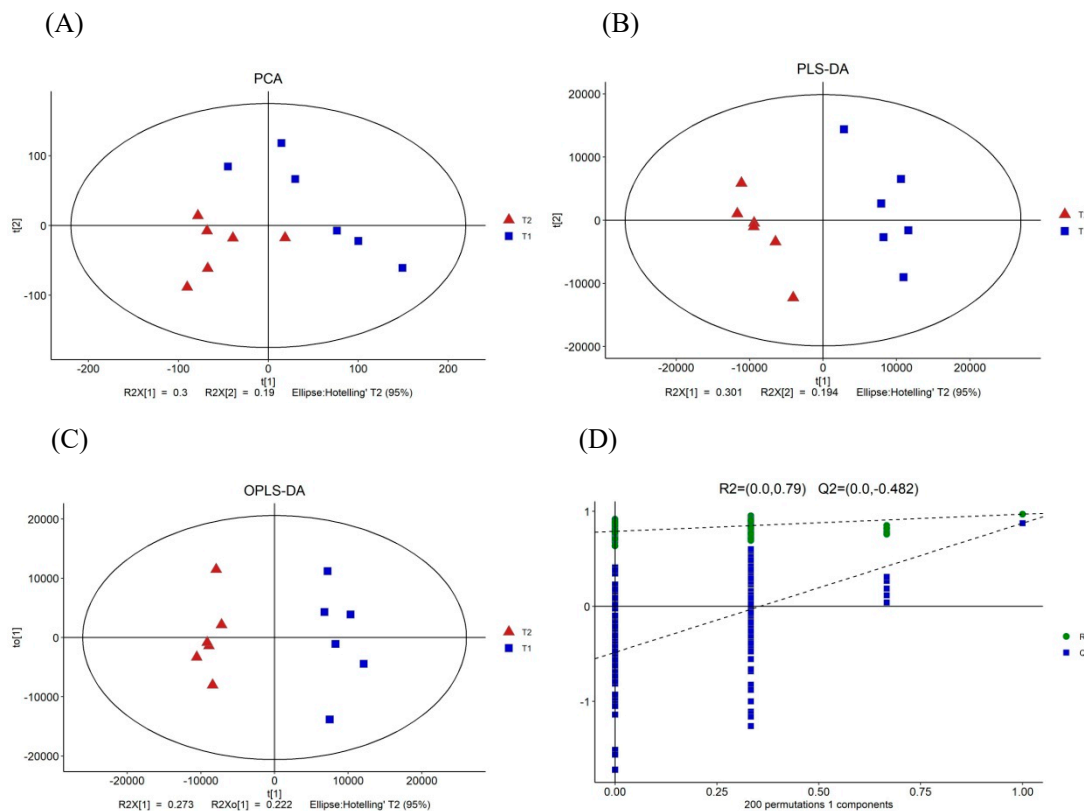

**Fig. S4.** Multivariate statistical score scatter plots and permutation test between T2 and T1. (A) PCA; (B) PLS-DA; (C) OPLS-DA; (D) permutation test of the OPLS-DA model.

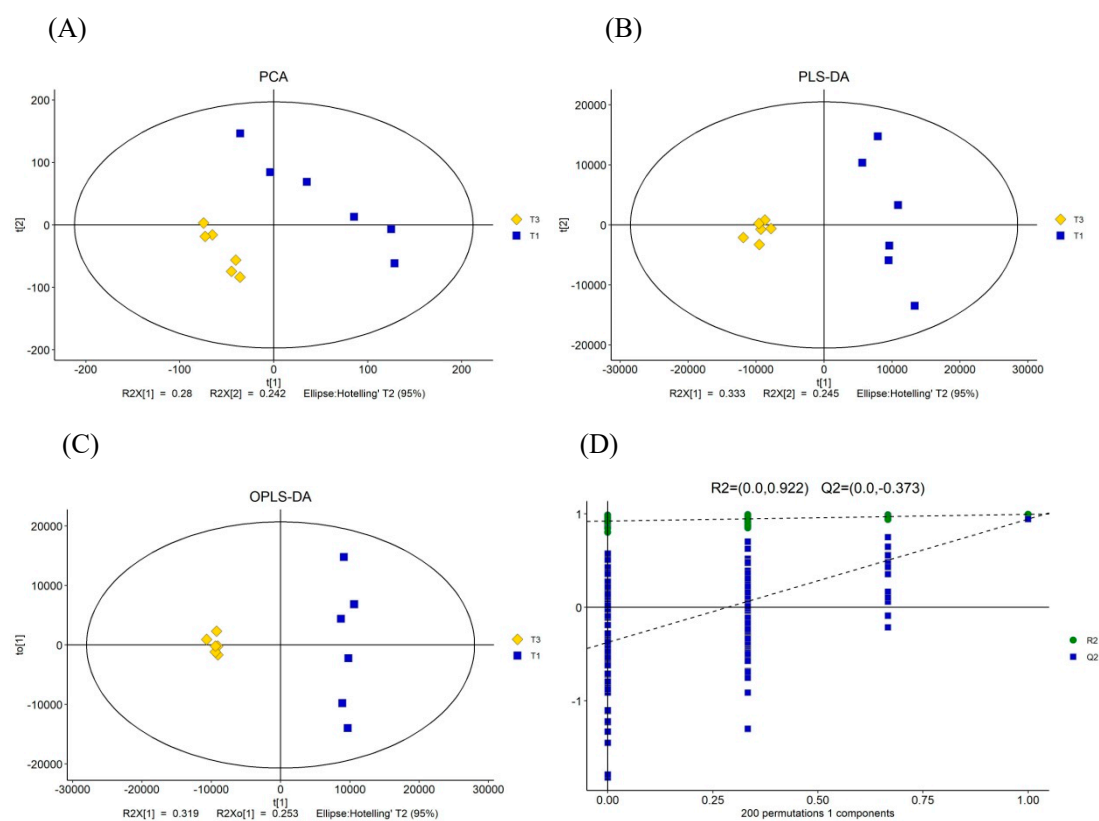

**Fig. S5.** Multivariate statistical score scatter plots and permutation test between T3 and T1. (A) PCA; (B) PLS-DA; (C) OPLS-DA; (D) permutation test of the OPLS-DA model.
